# Supplementary material for: Effect of Sibutramine on Cardiovascular Outcomes in Overweight and Obese Subjects
Source: Atypon-hosted journal article supplement (doi:10.1056/nejmoa1003114), 2010-09-01
Supplement: nejmoa1003114_appendix.pdf [file nejmoa1003114_appendix.pdf]

## Supplementary Appendix

This appendix has been provided by the authors to give readers additional information about their work.

Supplement to: James WPT, Caterson ID, Coutinho W, et al. Effect of sibutramine on cardiovascular outcomes in overweight and obese subjects. *N Engl J Med* 2010;363:905-17.

## **SUPPLEMENTAL ON-LINE APPENDIX**

### **Primary Outcome**

The primary outcome (primary endpoint) was the time from randomization to the first occurrence of any of the following outcome events:

- Nonfatal myocardial infarction,
- Nonfatal stroke,
- Resuscitated cardiac arrest, or
- Cardiovascular death (including events such as fatal myocardial infarction and fatal stroke).

### **Secondary Outcomes**

There were 6 secondary outcomes, which were the time from randomization to the onset of each of the following:

- Death due to any cause
- First myocardial infarction
- First stroke
- Cardiovascular death (including events such as fatal myocardial infarction and fatal stroke)
- First occurrence of a composite outcome that included nonfatal myocardial infarction, nonfatal stroke, resuscitated cardiac arrest, cardiovascular death (including events such as fatal myocardial infarction and fatal stroke), and any of

the following revascularization procedures: PTCA, CABG, coronary artery stent placement, cardiac transplant, peripheral vascular bypass or angioplasty, and carotid endarterectomy)

- First occurrence of either hemodialysis or renal transplantation

For secondary outcomes of first myocardial infarction, first stroke, and cardiovascular death, analyses were conducted for (1) events restricted to the primary outcome and (2) events not restricted to the primary outcome.

**Adverse Events leading to discontinuation of study drug or serious adverse events with at least 0.5% incidence or with a statistically significant difference in incidence between groups**

| MedDRA Preferred Term#                                            | Number (%) of Subjects |                         |
|-------------------------------------------------------------------|------------------------|-------------------------|
|                                                                   | Placebo<br>N = 4881    | Sibutramine<br>N = 4904 |
| <b>Any adverse event leading to discontinuation of study drug</b> | <b>607 (12.4)</b>      | <b>667 (13.6)</b>       |
| Myocardial infarction                                             | 33 (0.7)               | 34 (0.7)                |
| Atrial fibrillation                                               | 13 (0.3)               | 26 (0.5)                |
| Constipation                                                      | 10 (0.2)               | 22 (0.4)*               |
| Acute myocardial infarction                                       | 32 (0.7)               | 20 (0.4)                |
| Sudden death                                                      | 26 (0.5)               | 18 (0.4)                |
| Tachycardia                                                       | 1 (<0.1)               | 8 (0.2)*                |
| Abdominal pain upper                                              | 0                      | 7 (0.1)*                |
| Cardiac failure acute                                             | 6 (0.1)*               | 0                       |
| Left ventricular failure                                          | 5 (0.1)*               | 0                       |
| <b>Any serious adverse event</b>                                  | <b>1977 (40.5)</b>     | <b>2063 (42.1)</b>      |
| Coronary artery disease                                           | 118 (2.4)              | 135 (2.8)               |
| Angina unstable                                                   | 104 (2.1)              | 122 (2.5)               |
| Atrial fibrillation                                               | 135 (2.8)              | 115 (2.3)               |
| Angina pectoris                                                   | 133 (2.7)              | 111 (2.3)               |
| Osteoarthritis                                                    | 88 (1.8)               | 107 (2.2)               |
| Acute myocardial infarction                                       | 87 (1.8)               | 87 (1.8)                |

|                                      |          |           |
|--------------------------------------|----------|-----------|
| Myocardial infarction                | 80 (1.6) | 87 (1.8)  |
| Coronary artery stenosis             | 74 (1.5) | 76 (1.5)  |
| Cardiac failure                      | 80 (1.6) | 82 (1.7)  |
| Diabetes mellitus inadequate control | 50 (1.0) | 67 (1.4)  |
| Myocardial ischaemia                 | 36 (0.7) | 57 (1.2)* |
| Cardiac failure congestive           | 41 (0.8) | 53 (1.1)  |
| Peripheral artery occlusive disease  | 39 (0.8) | 52 (1.1)  |
| Pneumonia                            | 59 (1.2) | 51 (1.0)  |
| Cerebrovascular accident             | 44 (0.9) | 46 (0.9)  |
| Ischaemic stroke                     | 22 (0.5) | 42 (0.9)* |
| Benign prostatic hyperplasia         | 30 (0.6) | 39 (0.8)  |
| Transient ischemic attack            | 36 (0.7) | 34 (0.7)  |
| Carotid artery stenosis              | 32 (0.7) | 30 (0.6)  |
| Diabetes mellitus                    | 28 (0.6) | 30 (0.6)  |
| Cataract                             | 29 (0.6) | 33 (0.7)  |
| Cholelithiasis                       | 25 (0.5) | 26 (0.5)  |
| Prostate cancer                      | 20 (0.4) | 26 (0.5)  |
| Acute coronary syndrome              | 26 (0.5) | 25 (0.5)  |
| Death                                | 18 (0.4) | 25 (0.5)  |
| Ventricular tachycardia              | 18 (0.4) | 25 (0.5)  |
| Cardiac arrest                       | 14 (0.3) | 24 (0.5)  |
| Erysipelas                           | 14 (0.3) | 23 (0.5)  |
| Atrial flutter                       | 29 (0.6) | 21 (0.4)  |

|                                      |           |           |
|--------------------------------------|-----------|-----------|
| Sudden death                         | 26 (0.5)  | 19 (0.4)  |
| Hypertension                         | 26 (0.5)  | 17 (0.3)  |
| Urinary tract infection              | 23 (0.5)  | 16 (0.3)  |
| Varicose vein                        | 2 (< 0.1) | 14 (0.3)* |
| Osteomyelitis                        | 4 (< 0.1) | 13 (0.3)* |
| Duodenal ulcer haemorrhage           | 2 (< 0.1) | 12 (0.2)* |
| Pancreatitis acute                   | 14 (0.3)* | 3 (< 0.1) |
| Atrioventricular block second degree | 16 (0.3)* | 3 (< 0.1) |
| Tendon rupture                       | 10 (0.2)* | 2 (< 0.1) |
| Respiratory failure                  | 9 (0.2)*  | 1 (< 0.1) |
| Arrhythmia                           | 6 (0.1)*  | 0         |
| Hip fracture                         | 6 (0.1)*  | 0         |

\*  $P \leq 0.05$  for greater incidence compared with other group (Chi-squared test).

# The adverse events listed as those reported by the individual investigators and do not necessarily reflect adjudicated primary outcome events.

A serious adverse event was defined as an adverse event that resulted in any one of the following outcomes: death from any cause, a life-threatening episode, hospitalization or prolongation of pre-existing hospitalization, persistent disability or incapability, congenital anomaly, or the requirement for medical or surgical interventions to prevent the above serious outcomes (important medical event).

**Kaplan-Meier plots of the time to the primary outcome events and all-cause mortality for the three cardiovascular risk groups of DM only, CV only and CV+DM**

**Figure A: Primary outcome events for the DM only group**

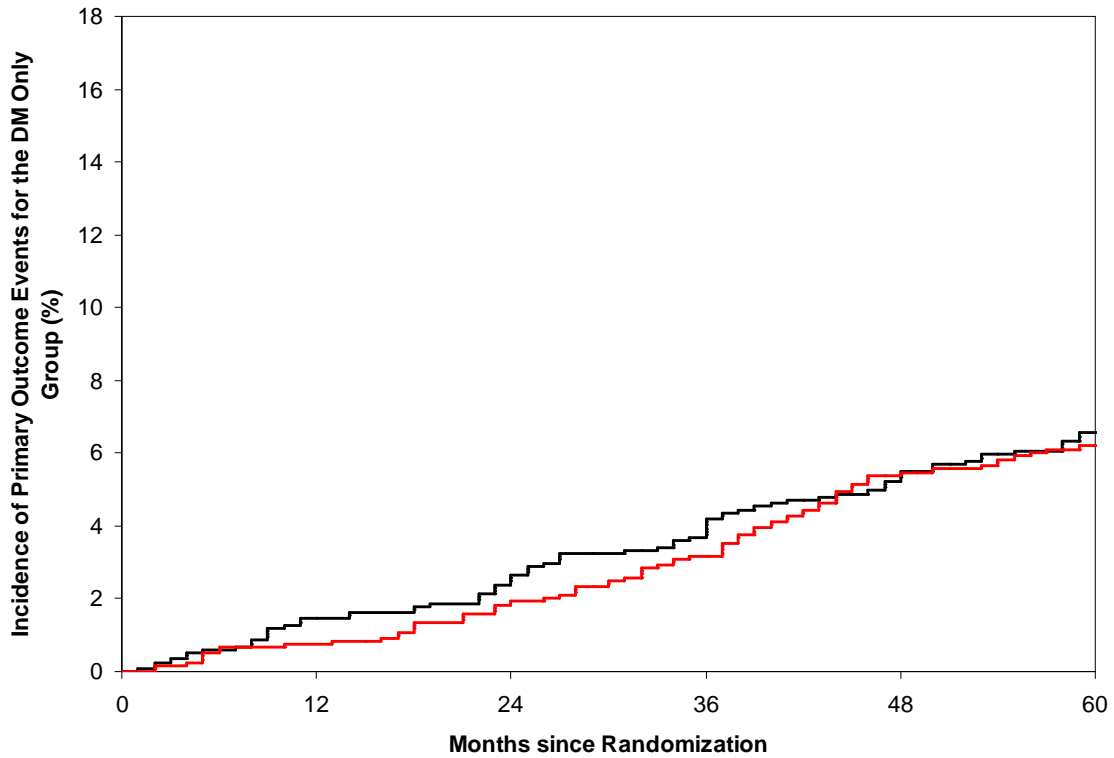

Figures adjusted for age (1.05 [1.02-1.08]), gender (0.60 [0.44-0.83]) and country ( $P < 0.001$ )

**Numbers at risk:**

| Time point | R    | M12  | M24  | M36  | M48  | M60 |
|------------|------|------|------|------|------|-----|
| PLA        | 1178 | 1156 | 1141 | 1118 | 1063 | 855 |
| SIB        | 1207 | 1188 | 1174 | 1150 | 1082 | 866 |

**Figure B: All-cause mortality for the DM only group**

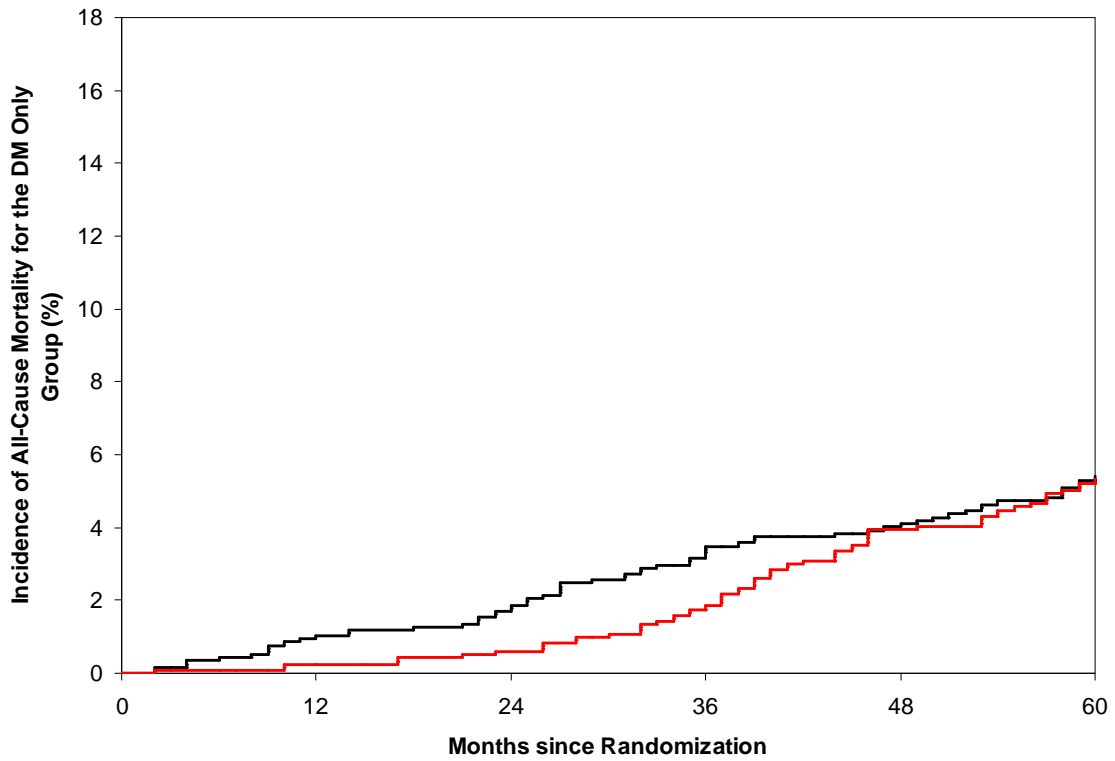

Figures adjusted for age (1.08 [1.05-1.11]), gender (0.68 [0.48-0.96]) and country ( $P < 0.001$ )

**Numbers at risk:**

| Time point | R    | M12  | M24  | M36  | M48  | M60 |
|------------|------|------|------|------|------|-----|
| PLA        | 1178 | 1164 | 1155 | 1136 | 1090 | 882 |
| SIB        | 1207 | 1196 | 1190 | 1173 | 1113 | 894 |

**Figure C: Primary outcome events for the CV only group**

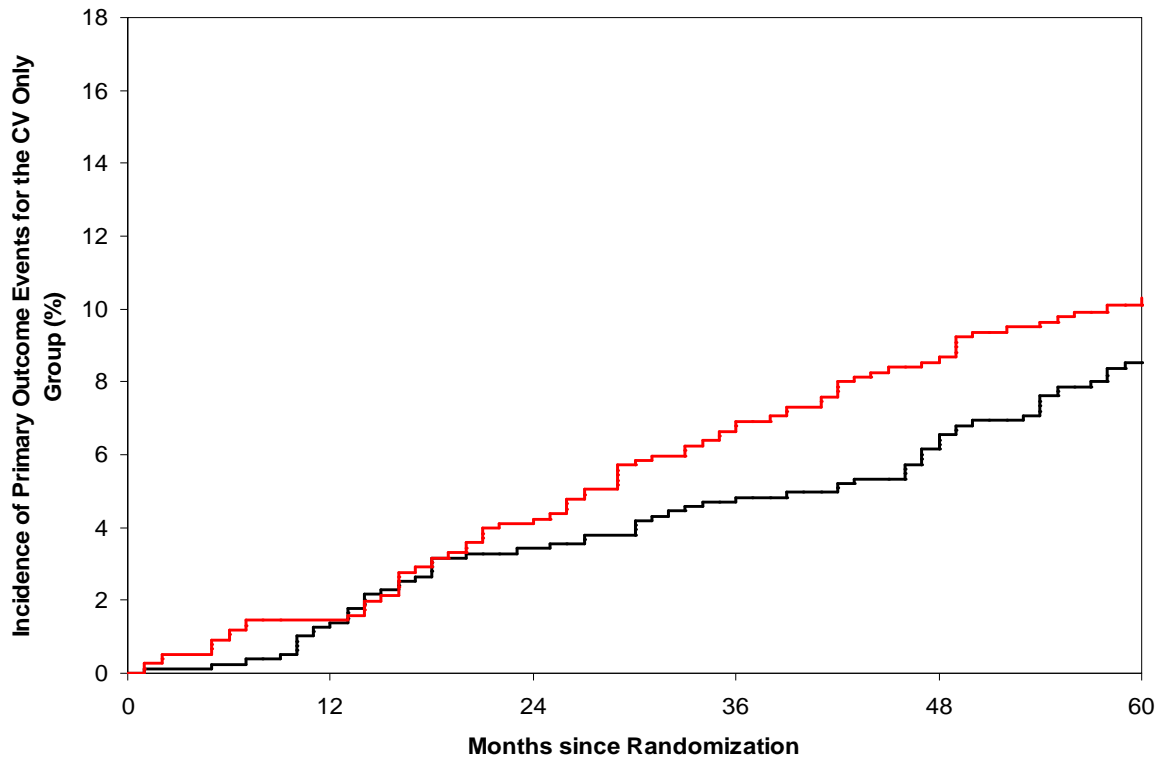

Figures adjusted for age (1.05 [1.03-1.08]), gender (0.55 [0.37-0.81]) and country ( $P=0.989$ )

**Numbers at risk:**

| Time point | R   | M12 | M24 | M36 | M48 | M60 |
|------------|-----|-----|-----|-----|-----|-----|
| PLA        | 793 | 779 | 758 | 741 | 712 | 473 |
| SIB        | 759 | 744 | 720 | 695 | 668 | 443 |

**Figure D: All-cause mortality for the CV only group**

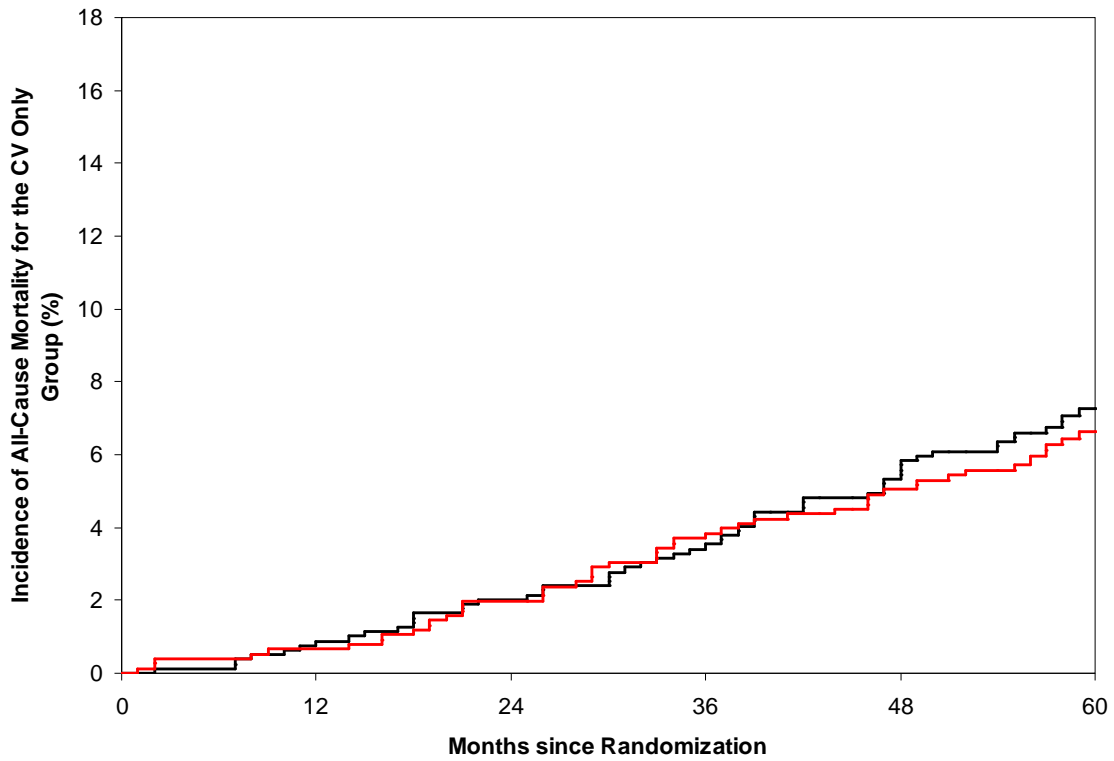

Figures adjusted for age (1.10 [1.07-1.13]), gender (0.68 [0.44-1.04]) and country ( $P=0.655$ )

**Numbers at risk:**

| Time point | R   | M12 | M24 | M36 | M48 | M60 |
|------------|-----|-----|-----|-----|-----|-----|
| PLA        | 793 | 786 | 775 | 763 | 738 | 501 |
| SIB        | 759 | 753 | 741 | 726 | 709 | 476 |

**Figure E: Primary outcome events for the CV+DM group**

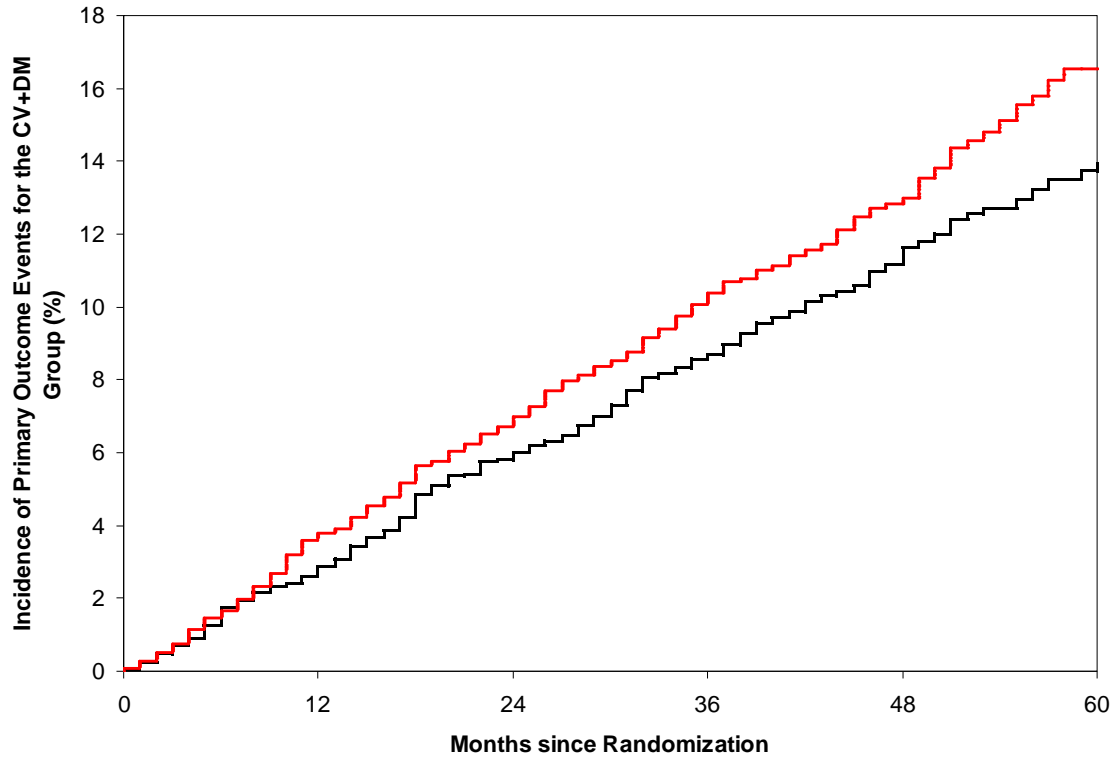

Figures adjusted for age (1.03 [1.02-1.04]), gender (0.71 [0.61-0.83]) and country ( $P=0.002$ )

**Numbers at risk:**

| Time point | R    | M12  | M24  | M36  | M48  | M60 |
|------------|------|------|------|------|------|-----|
| PLA        | 2901 | 2815 | 2699 | 2598 | 1667 | 381 |
| SIB        | 2906 | 2783 | 2674 | 2550 | 1622 | 388 |

**Figure F: All-cause mortality for the CV+DM group**

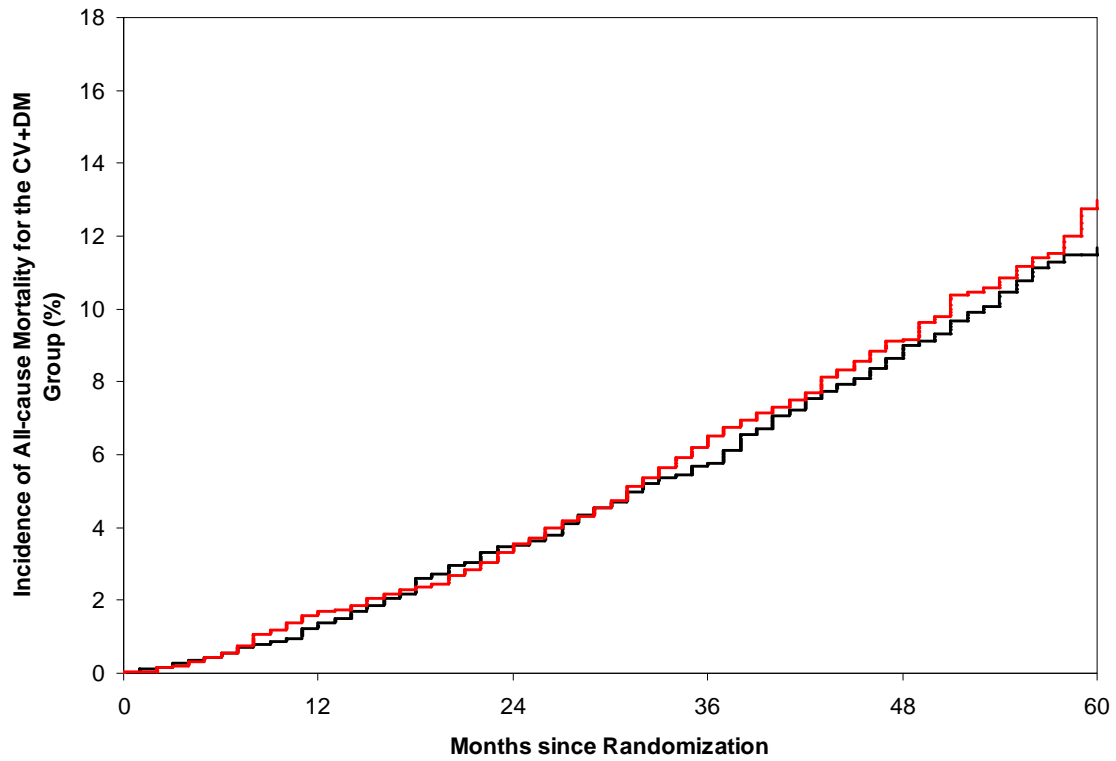

Figures adjusted for age (1.07 [1.06-1.08]), gender (0.63 [0.53-0.76]) and country ( $P=0.002$ )

**Numbers at risk:**

| Time point | R    | M12  | M24  | M36  | M48  | M60 |
|------------|------|------|------|------|------|-----|
| <b>PLA</b> | 2901 | 2862 | 2788 | 2718 | 1775 | 411 |
| <b>SIB</b> | 2906 | 2855 | 2802 | 2708 | 1742 | 427 |

**Cardiovascular risk groups:**

DM only: Subjects with a history of type 2 diabetes mellitus with at least one other risk factor (i.e., hypertension controlled on medication, dyslipidemia, current cigarette smoking, diabetic nephropathy with evidence of microalbuminuria), but no history of protocol-specified coronary artery disease, cerebrovascular disease, or peripheral arterial occlusive disease

CV only: Subjects with a history of protocol-specified coronary artery disease, cerebrovascular disease, or peripheral arterial occlusive disease, but no history of type 2 diabetes mellitus with at least one other risk factor

CV+DM: Subjects with a history of protocol-specified coronary artery disease, cerebrovascular disease, or peripheral arterial occlusive disease, and a history of type 2 diabetes mellitus with at least one other risk factor

R: Randomization

M: Month

PLA: placebo - - - - -

SIB: sibutramine - - - - -
